# Supplementary material for: Bromination of aromatic compounds using an Fe2O3/zeolite catalyst
Source: Royal Society of Chemistry journal article supplement (doi:10.1039/c2gc35821b), 2012-01-01
Supplement: c2gc35821b.pdf [file c2gc35821b.pdf]

## Supplementary Information

### **Bromination of Aromatic Compounds Using an Fe<sub>2</sub>O<sub>3</sub>/Zeolite Catalyst**

Yuta Nishina,\* and Keishi Takami

## 1. Methods

**1-1. SEM measurements** SEM measurements were performed on SEM (JEOL JSM-6700FE). Sample powder was coated with evaporated platinum.

**1-2. EDX measurements** EDX measurements were performed on an SEM (JEOL JSM-6700FE) equipped with an energy-dispersive X-ray analyser (JEOL JED-2200F). The atomic ratio of Fe:Al:Si (at%) was determined.

**1-3. XRD measurements** X-ray diffraction patterns were obtained on an X-ray powder diffractometer (Rigaku RINT-2000) using Cu K $\alpha$  radiation.

**1-4. NMR measurements** NMR spectra were recorded using a JEOL JNM-LA400 spectrometer. Proton chemical shifts are relative to solvent peaks [chloroform: 7.27 ( $^1\text{H}$ ), 77.00 ( $^{13}\text{C}$ )]. The NMR spectra of products showed complete agreement with the known data.

**1-5. GC measurements** GC analysis was carried out with Shimadzu GC-2014 equipped with FID detector. The chemical yields were determined using dodecane as an internal standard. Calibration curves were prepared using commercially available standard samples.

## 2. Experimental Details

**2-1. Preparation of Catalyst**  $\text{FeCl}_3 \cdot 6\text{H}_2\text{O}$  (1 mmol) and zeolite (1 g) were stirred in MeOH (1 mL) for 1 h. Solvent was removed by rotary evaporator. The recovered solid material was calcined at 300 °C for 1 h.

Other catalysts were prepared with the same procedure.

**2-2. Bromination of aromatic compounds** The  $\text{Fe}_2\text{O}_3/\text{zeolite}$  was heated with heating gun (HAKKO, No.881, 1000W) for 10 min in a vacuum prior to use to remove adsorbed  $\text{H}_2\text{O}$ . All reactions were performed in argon atmosphere using dehydrated benzene (Table 1, Figure 4, and Scheme 2) or dehydrated  $\text{CH}_2\text{Cl}_2$  (Table 2) in screw-capped test tube.. After the reaction, the mixtures were treated with aq.  $\text{Na}_2\text{S}_2\text{O}_3$  to remove unreacted  $\text{Br}_2$ .

**2-3. Catalyst recycling method A** After the reaction, the reactor was connected to a vacuum pump with cold trap. After removal of solvent, starting materials, and product(s), the reactor was filled with argon and used for the next reaction.

**2-4. Catalyst recycling method B** After the reaction, the reaction mixture was filtered with Millipore membrane filter (0.2  $\mu\text{m}$ ). The collected pale brown solid ( $\text{FeBr}_3/\text{zeolite}$ ) was placed into a muffle furnace and heated at 300 °C for 1 h in air to give orange solid ( $\alpha\text{-Fe}_2\text{O}_3/\text{zeolite}$ ) ( Figure S1). The calcined catalyst was used for the next reaction.

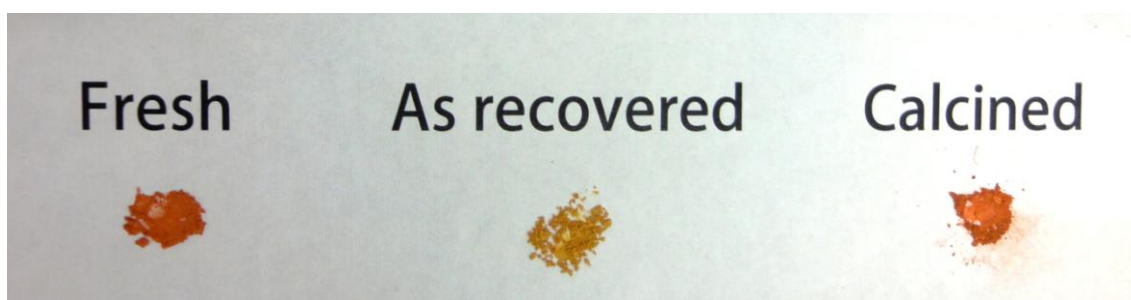

**Figure S1** Fresh Fe<sub>2</sub>O<sub>3</sub>/zeolite (left), as recovered catalyst (middle), and recovered and calcined catalyst (right).
